# Supplementary material for: Mark-release-recapture of male Aedes aegypti (Diptera: Culicidae): Use of rhodamine B to estimate movement, mating and population parameters in preparation for an incompatible male program
Source: PubMed Central journal article supplement (PMC8183986; doi:10.1371/journal.pntd.0009357), 2021-06-07

# Wind Direction and Speed MRR-1

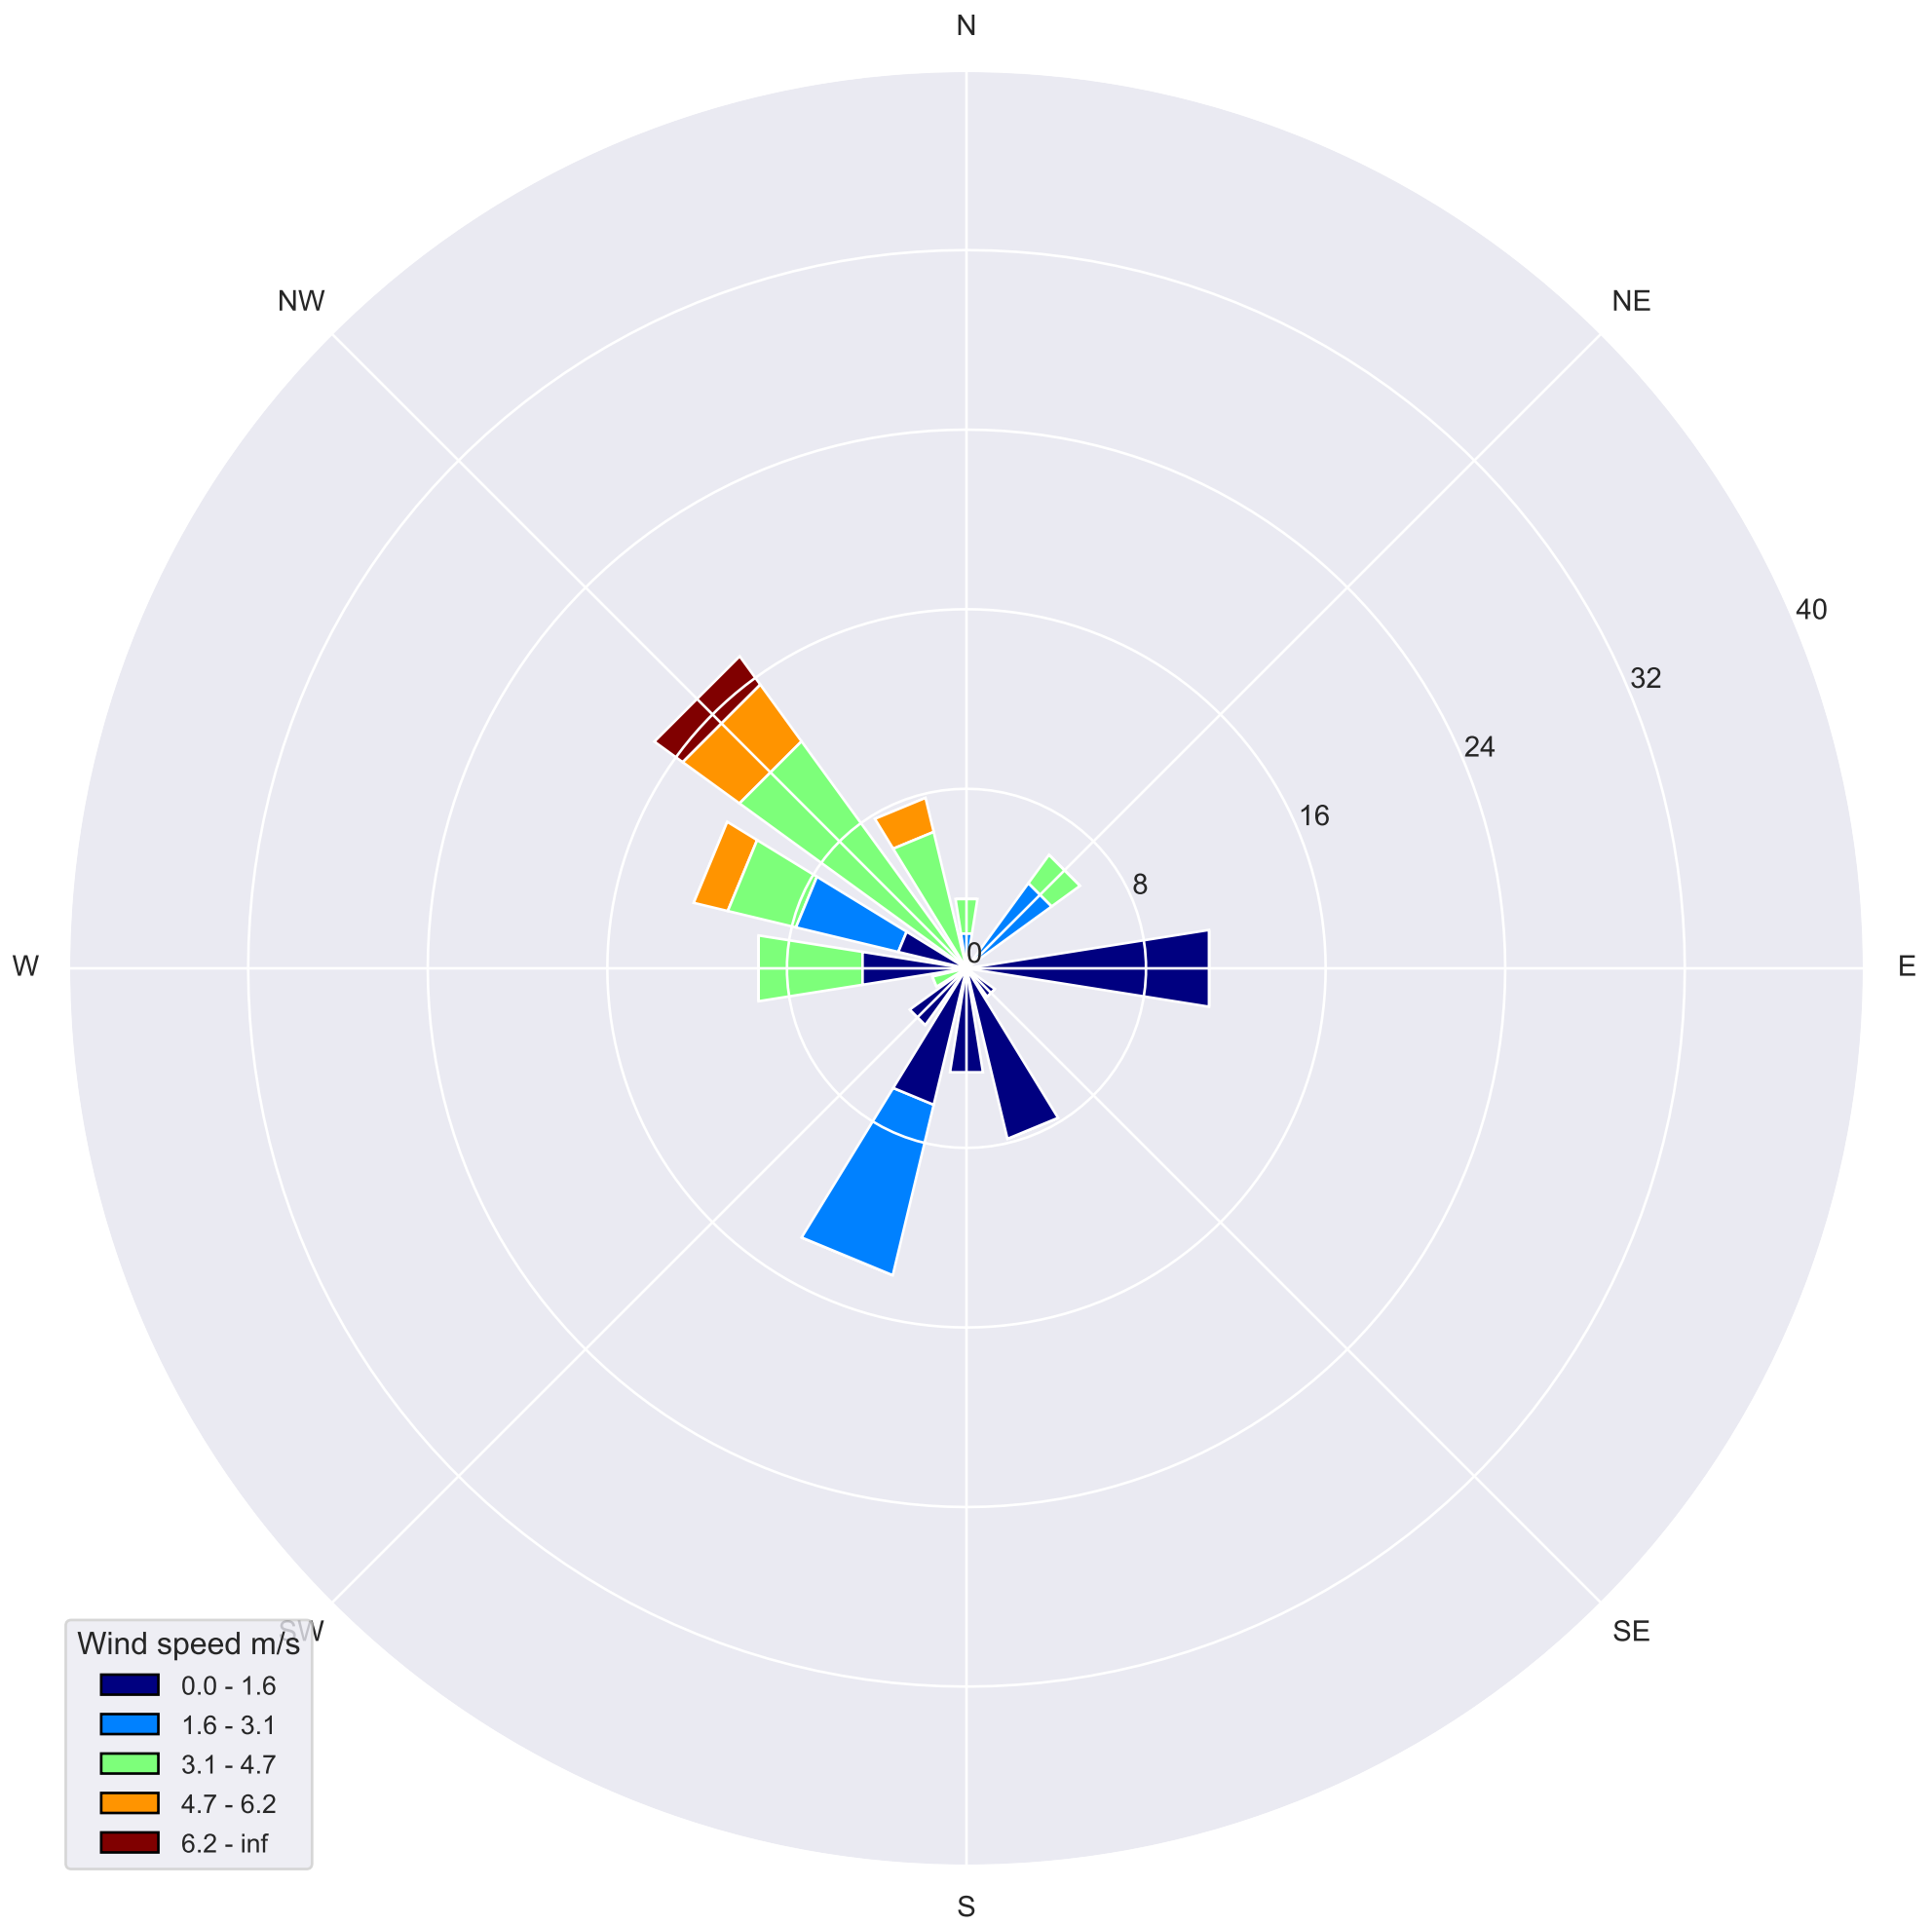

# Wind Direction and Speed MRR-2

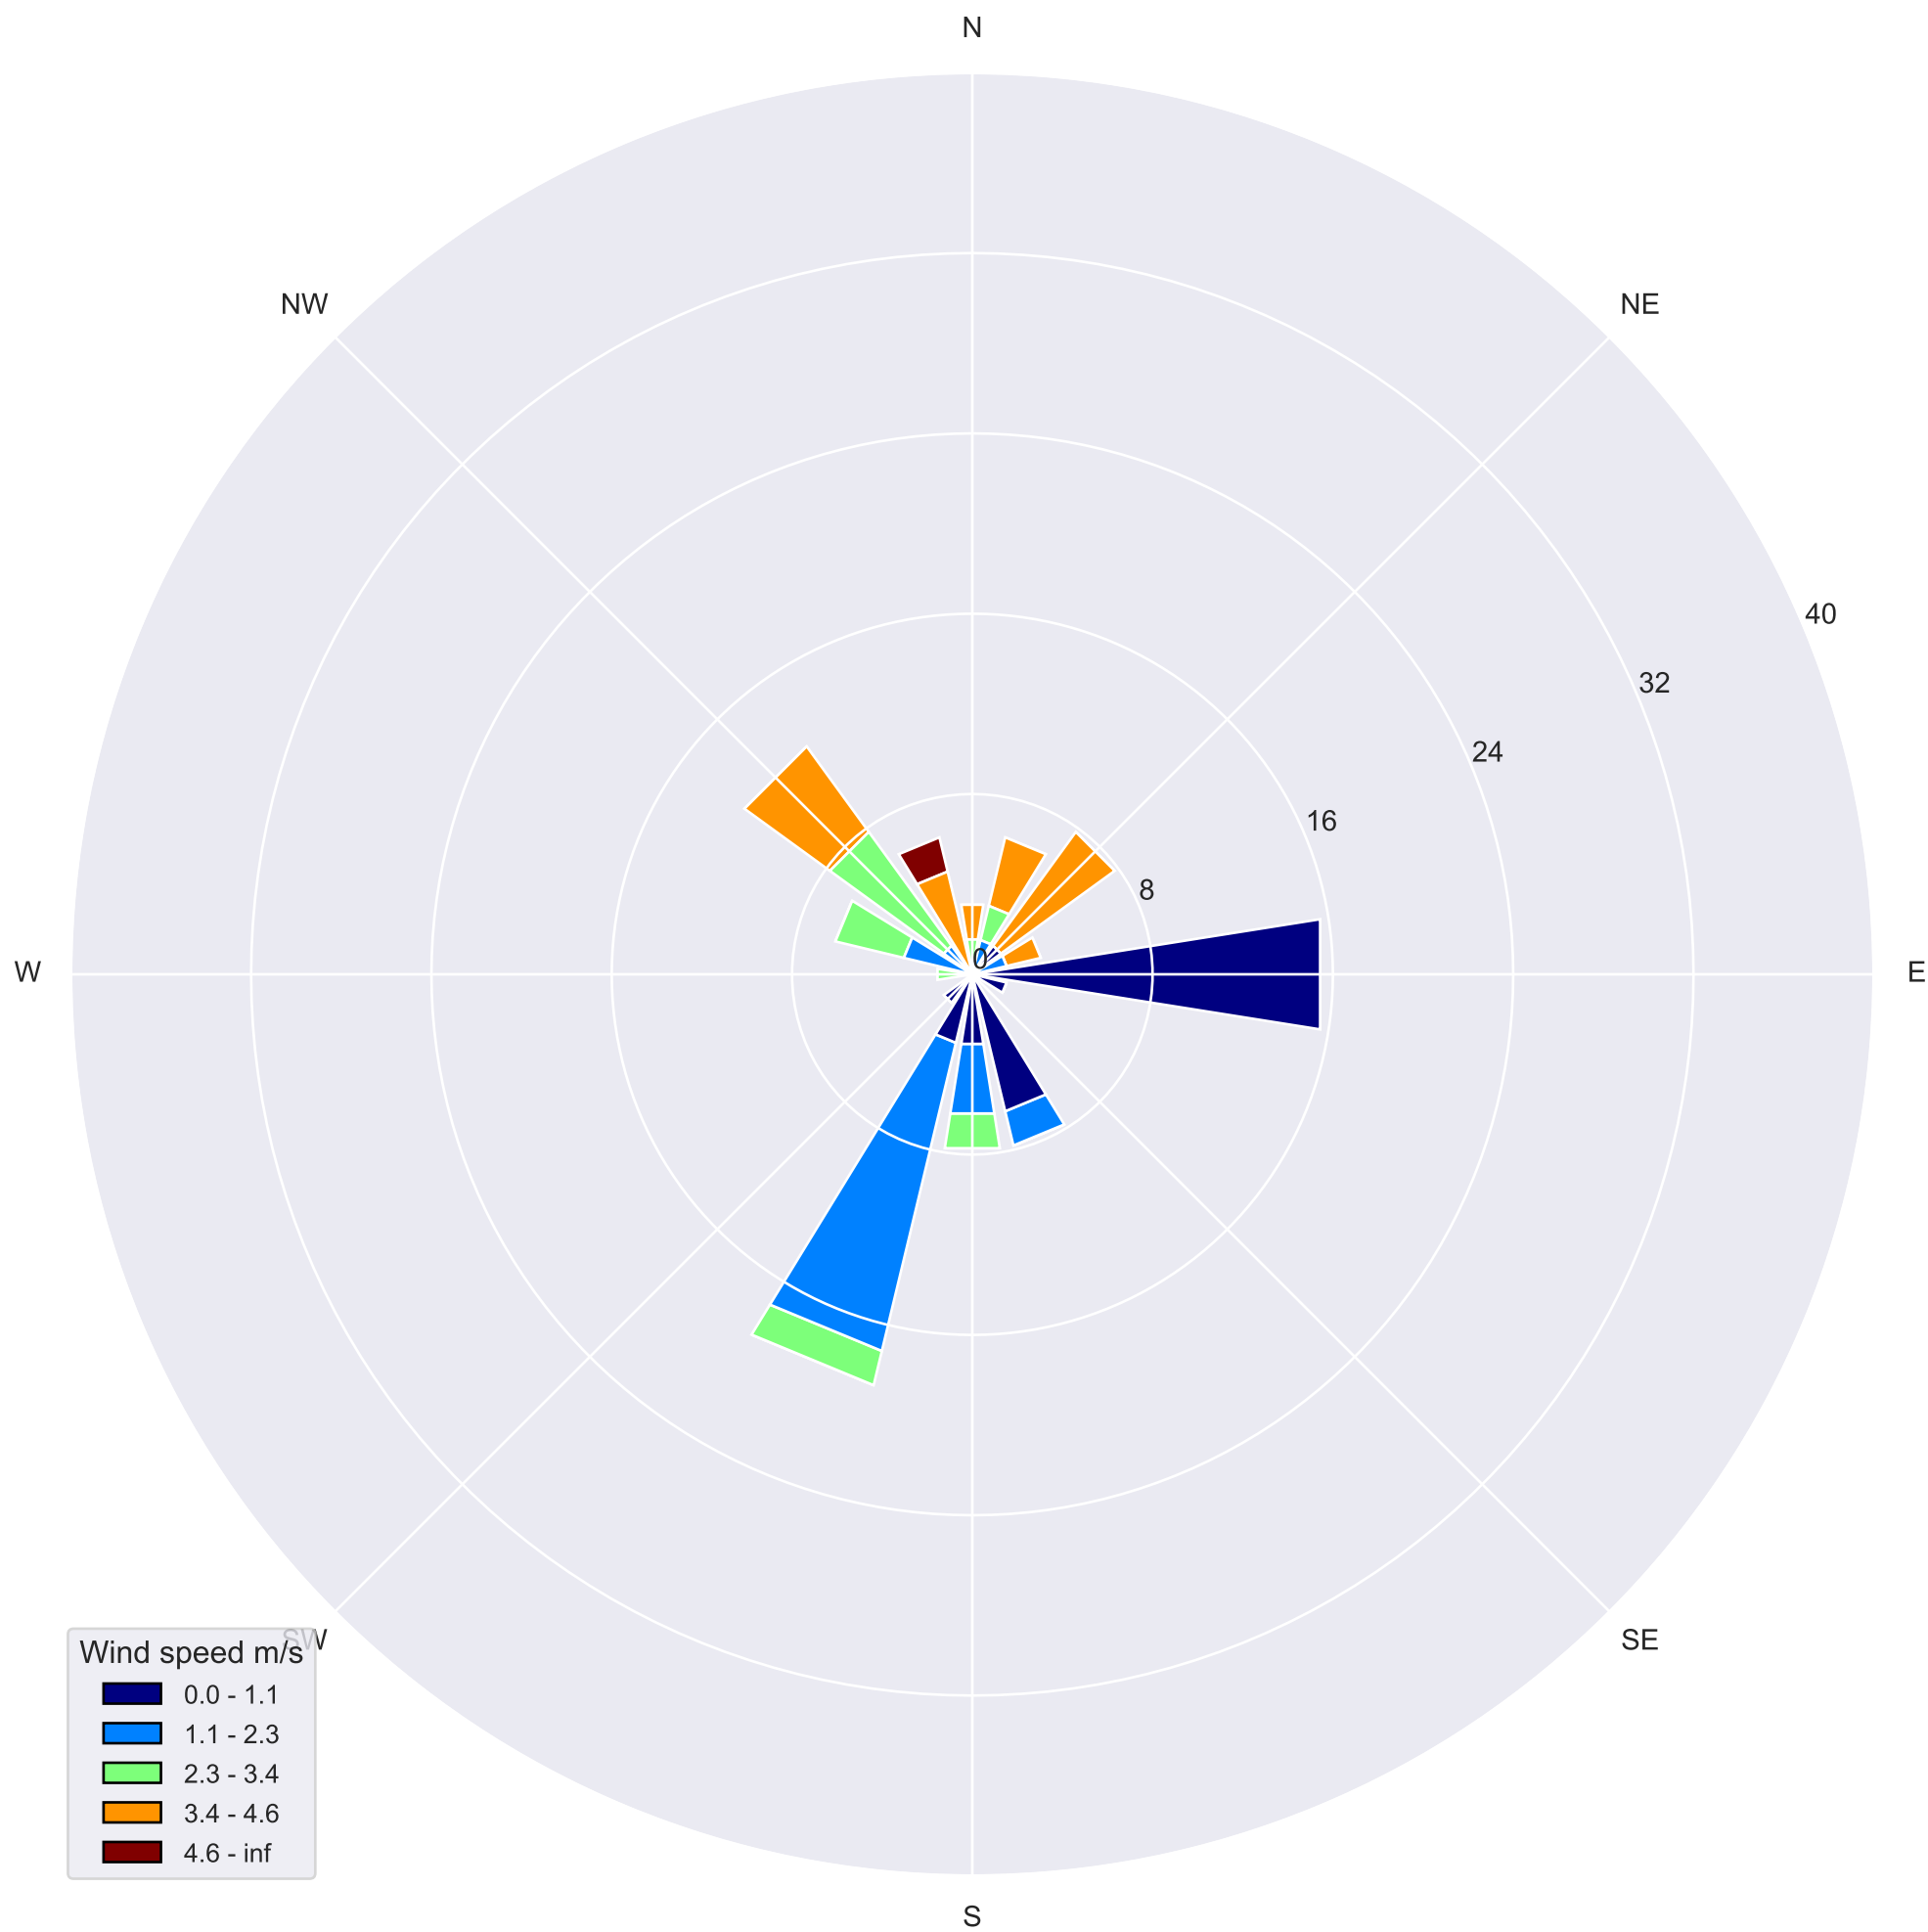

# Wind Direction and Speed MRR-3

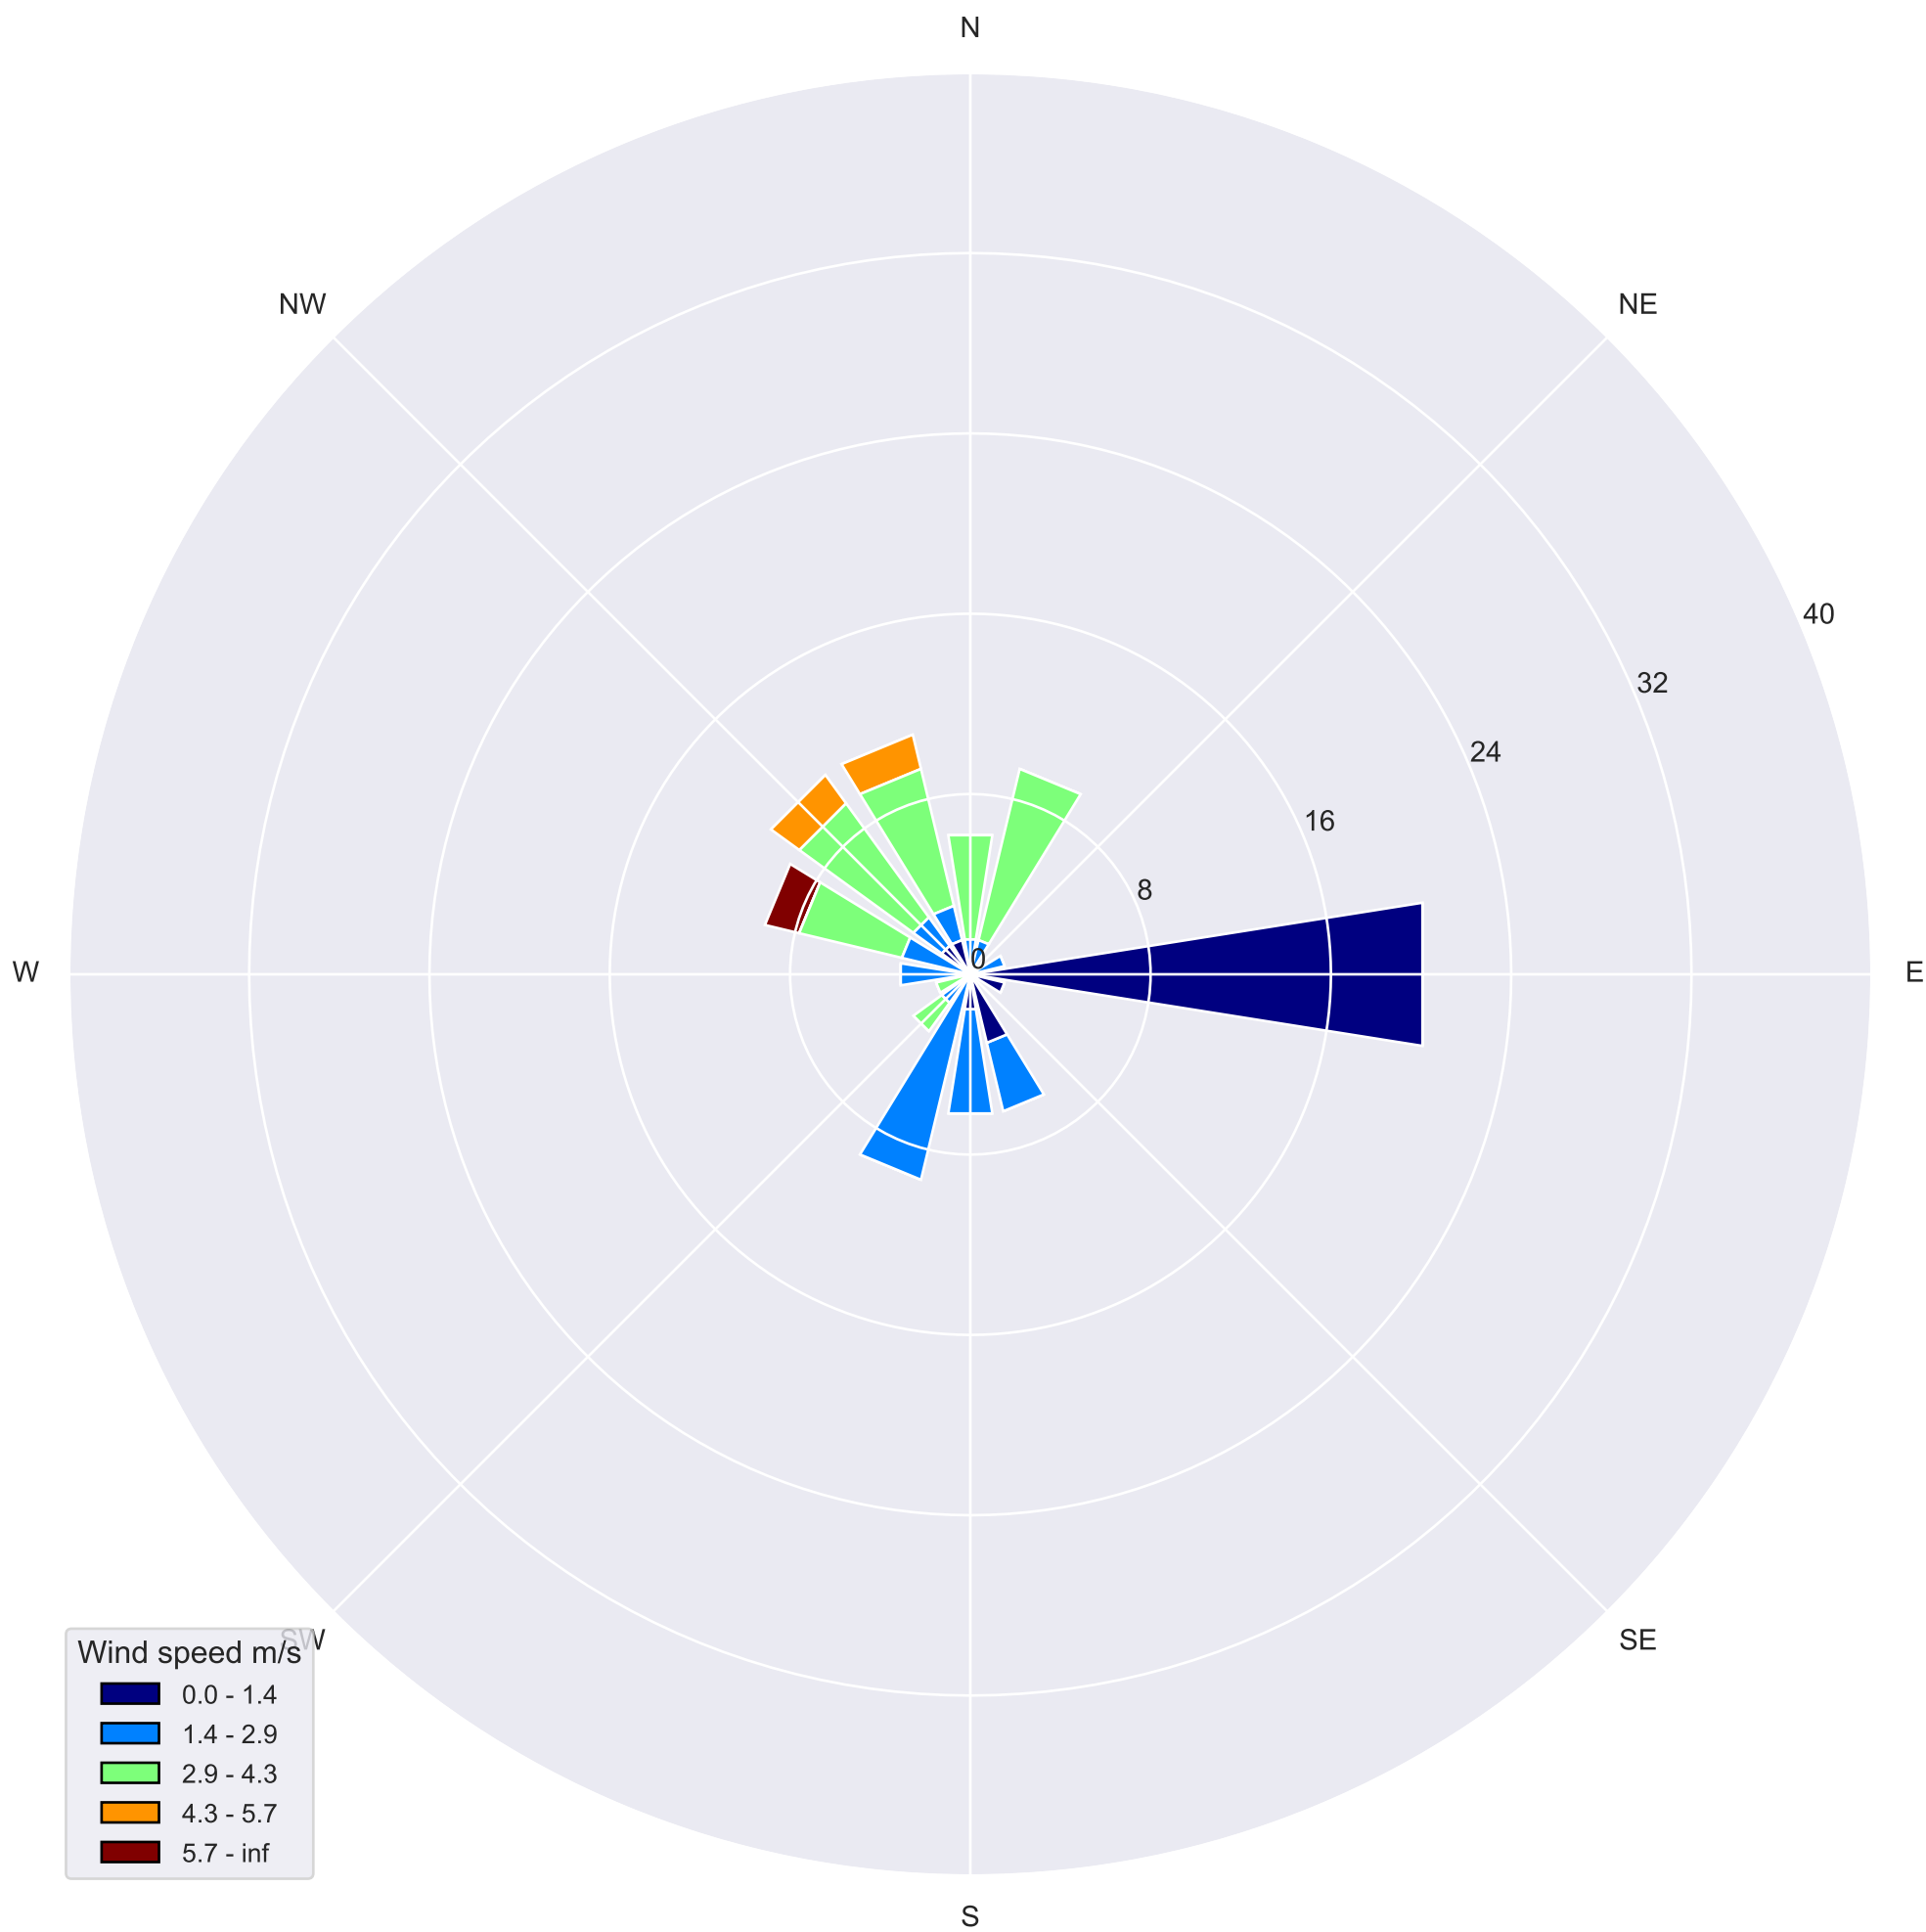

# Wind Direction and Speed MRR-4

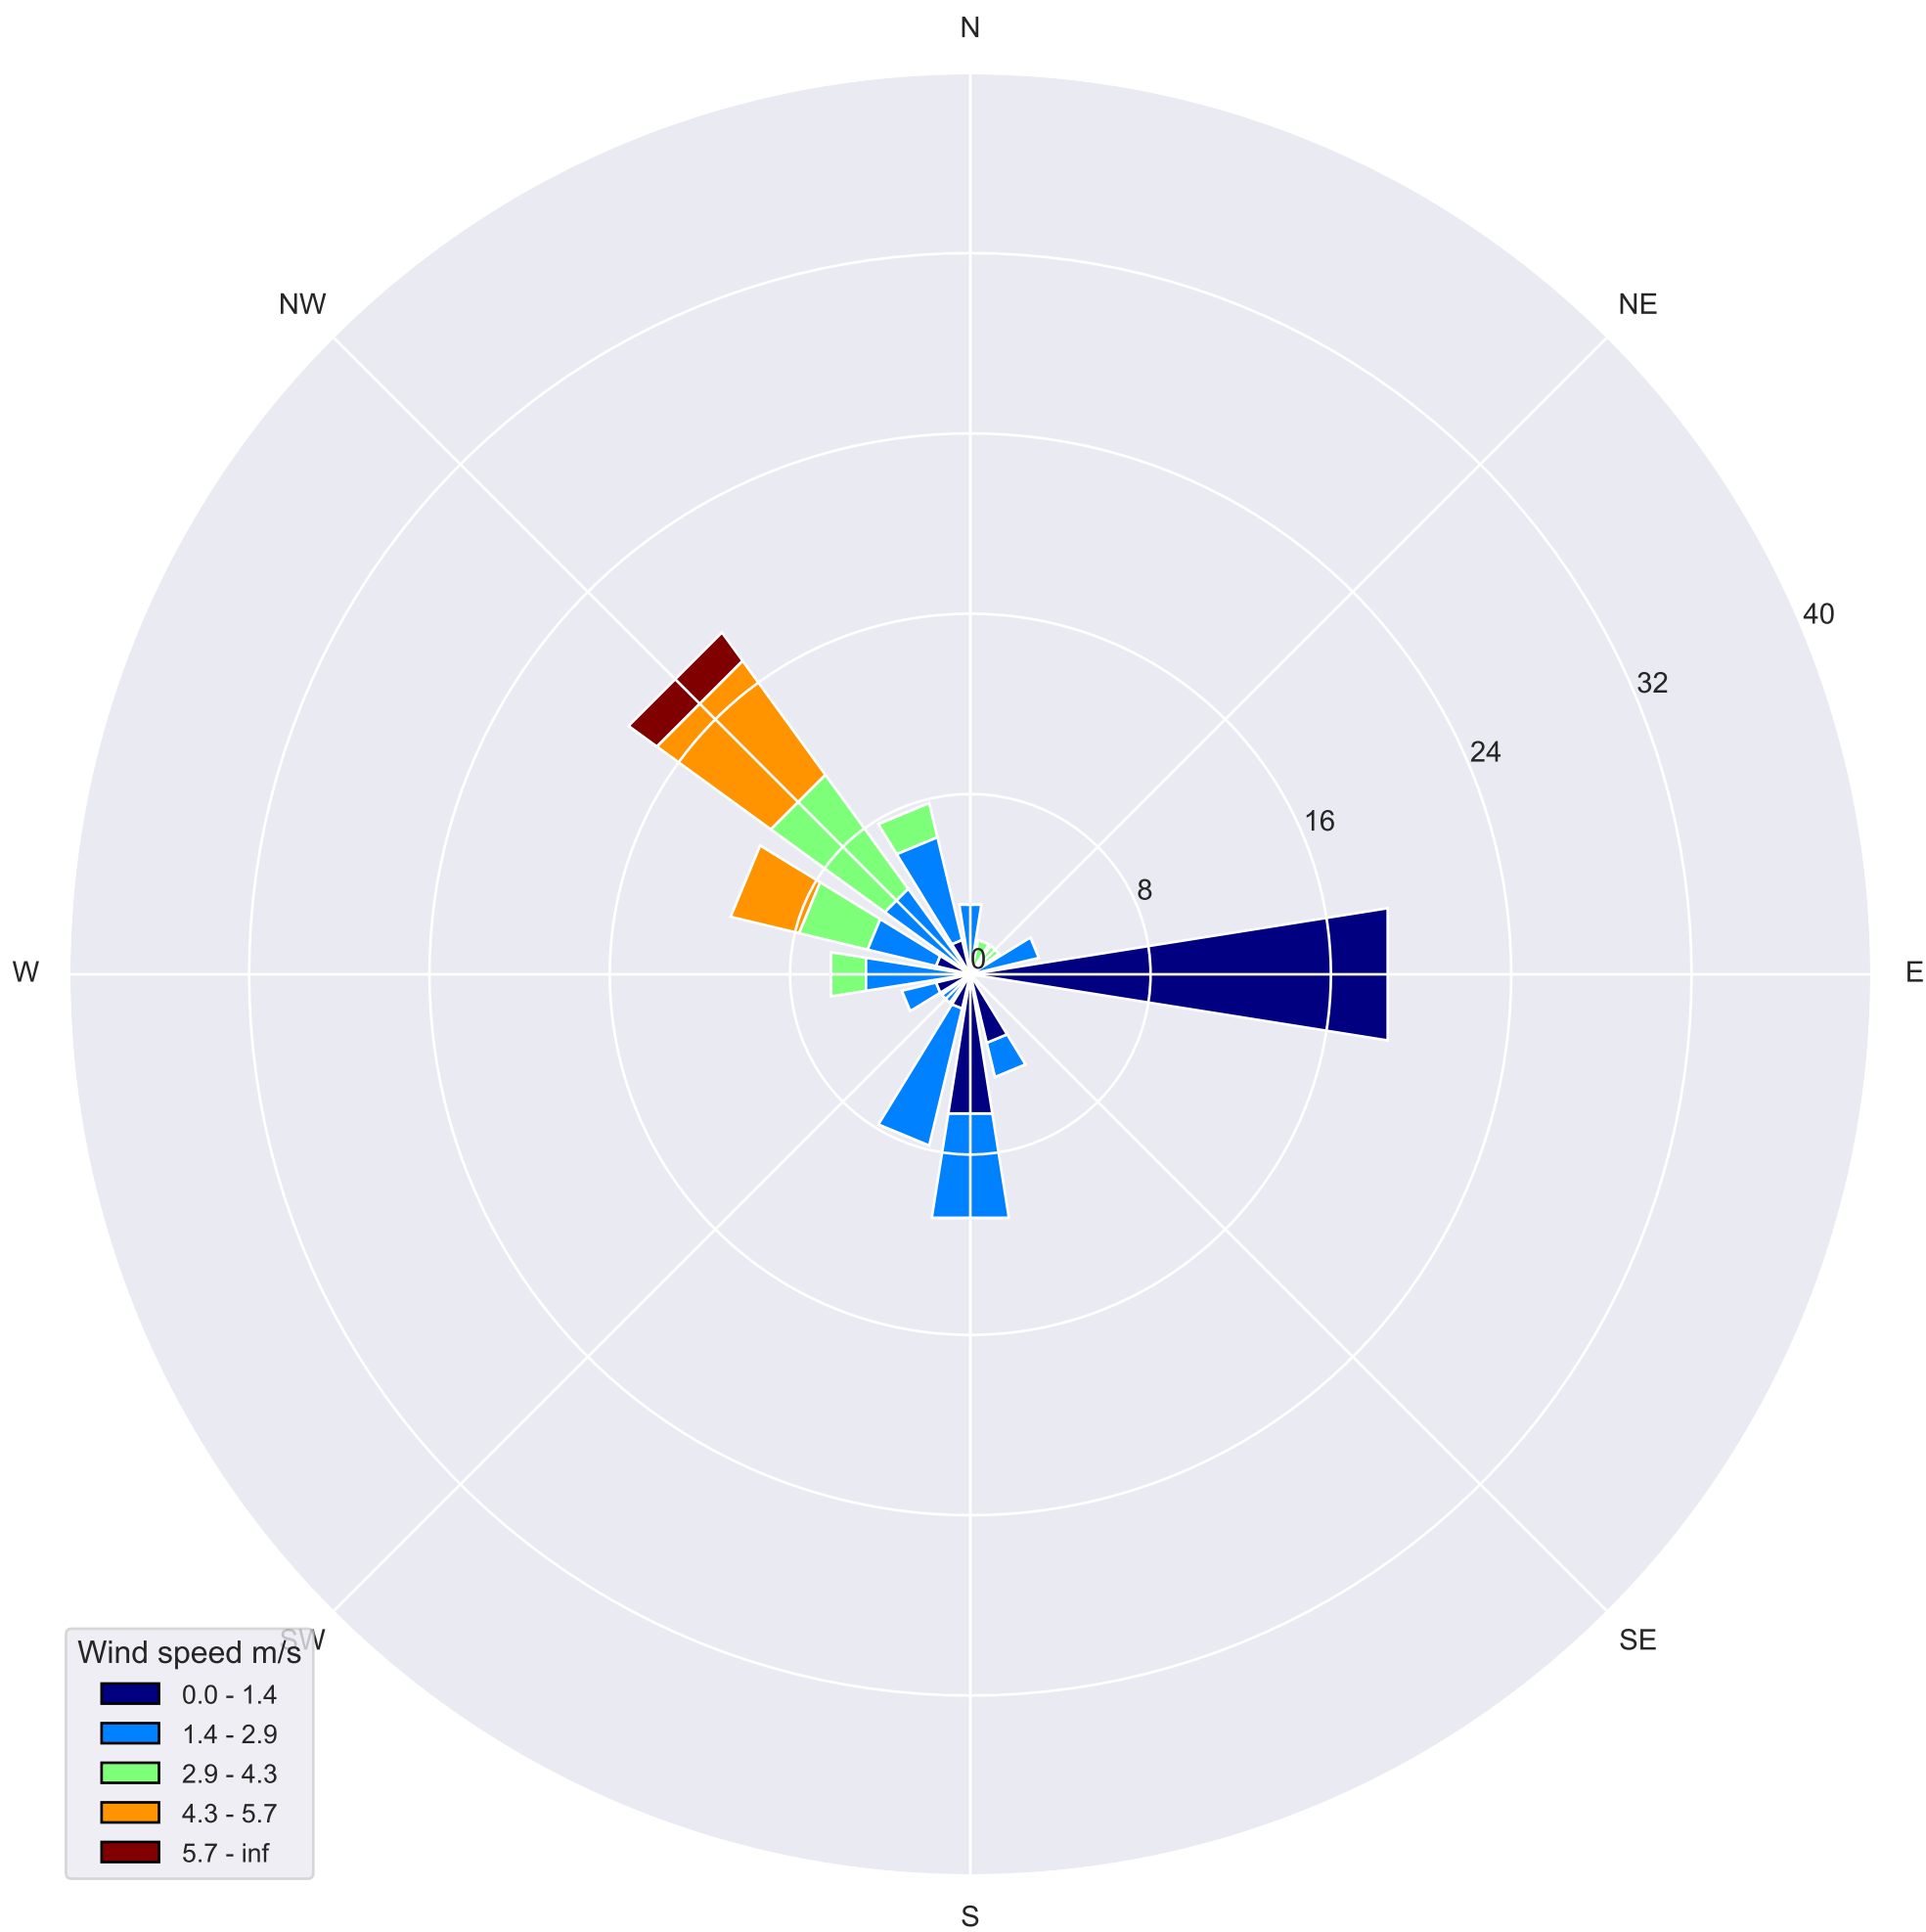

# Wind Direction and Speed MRR-5

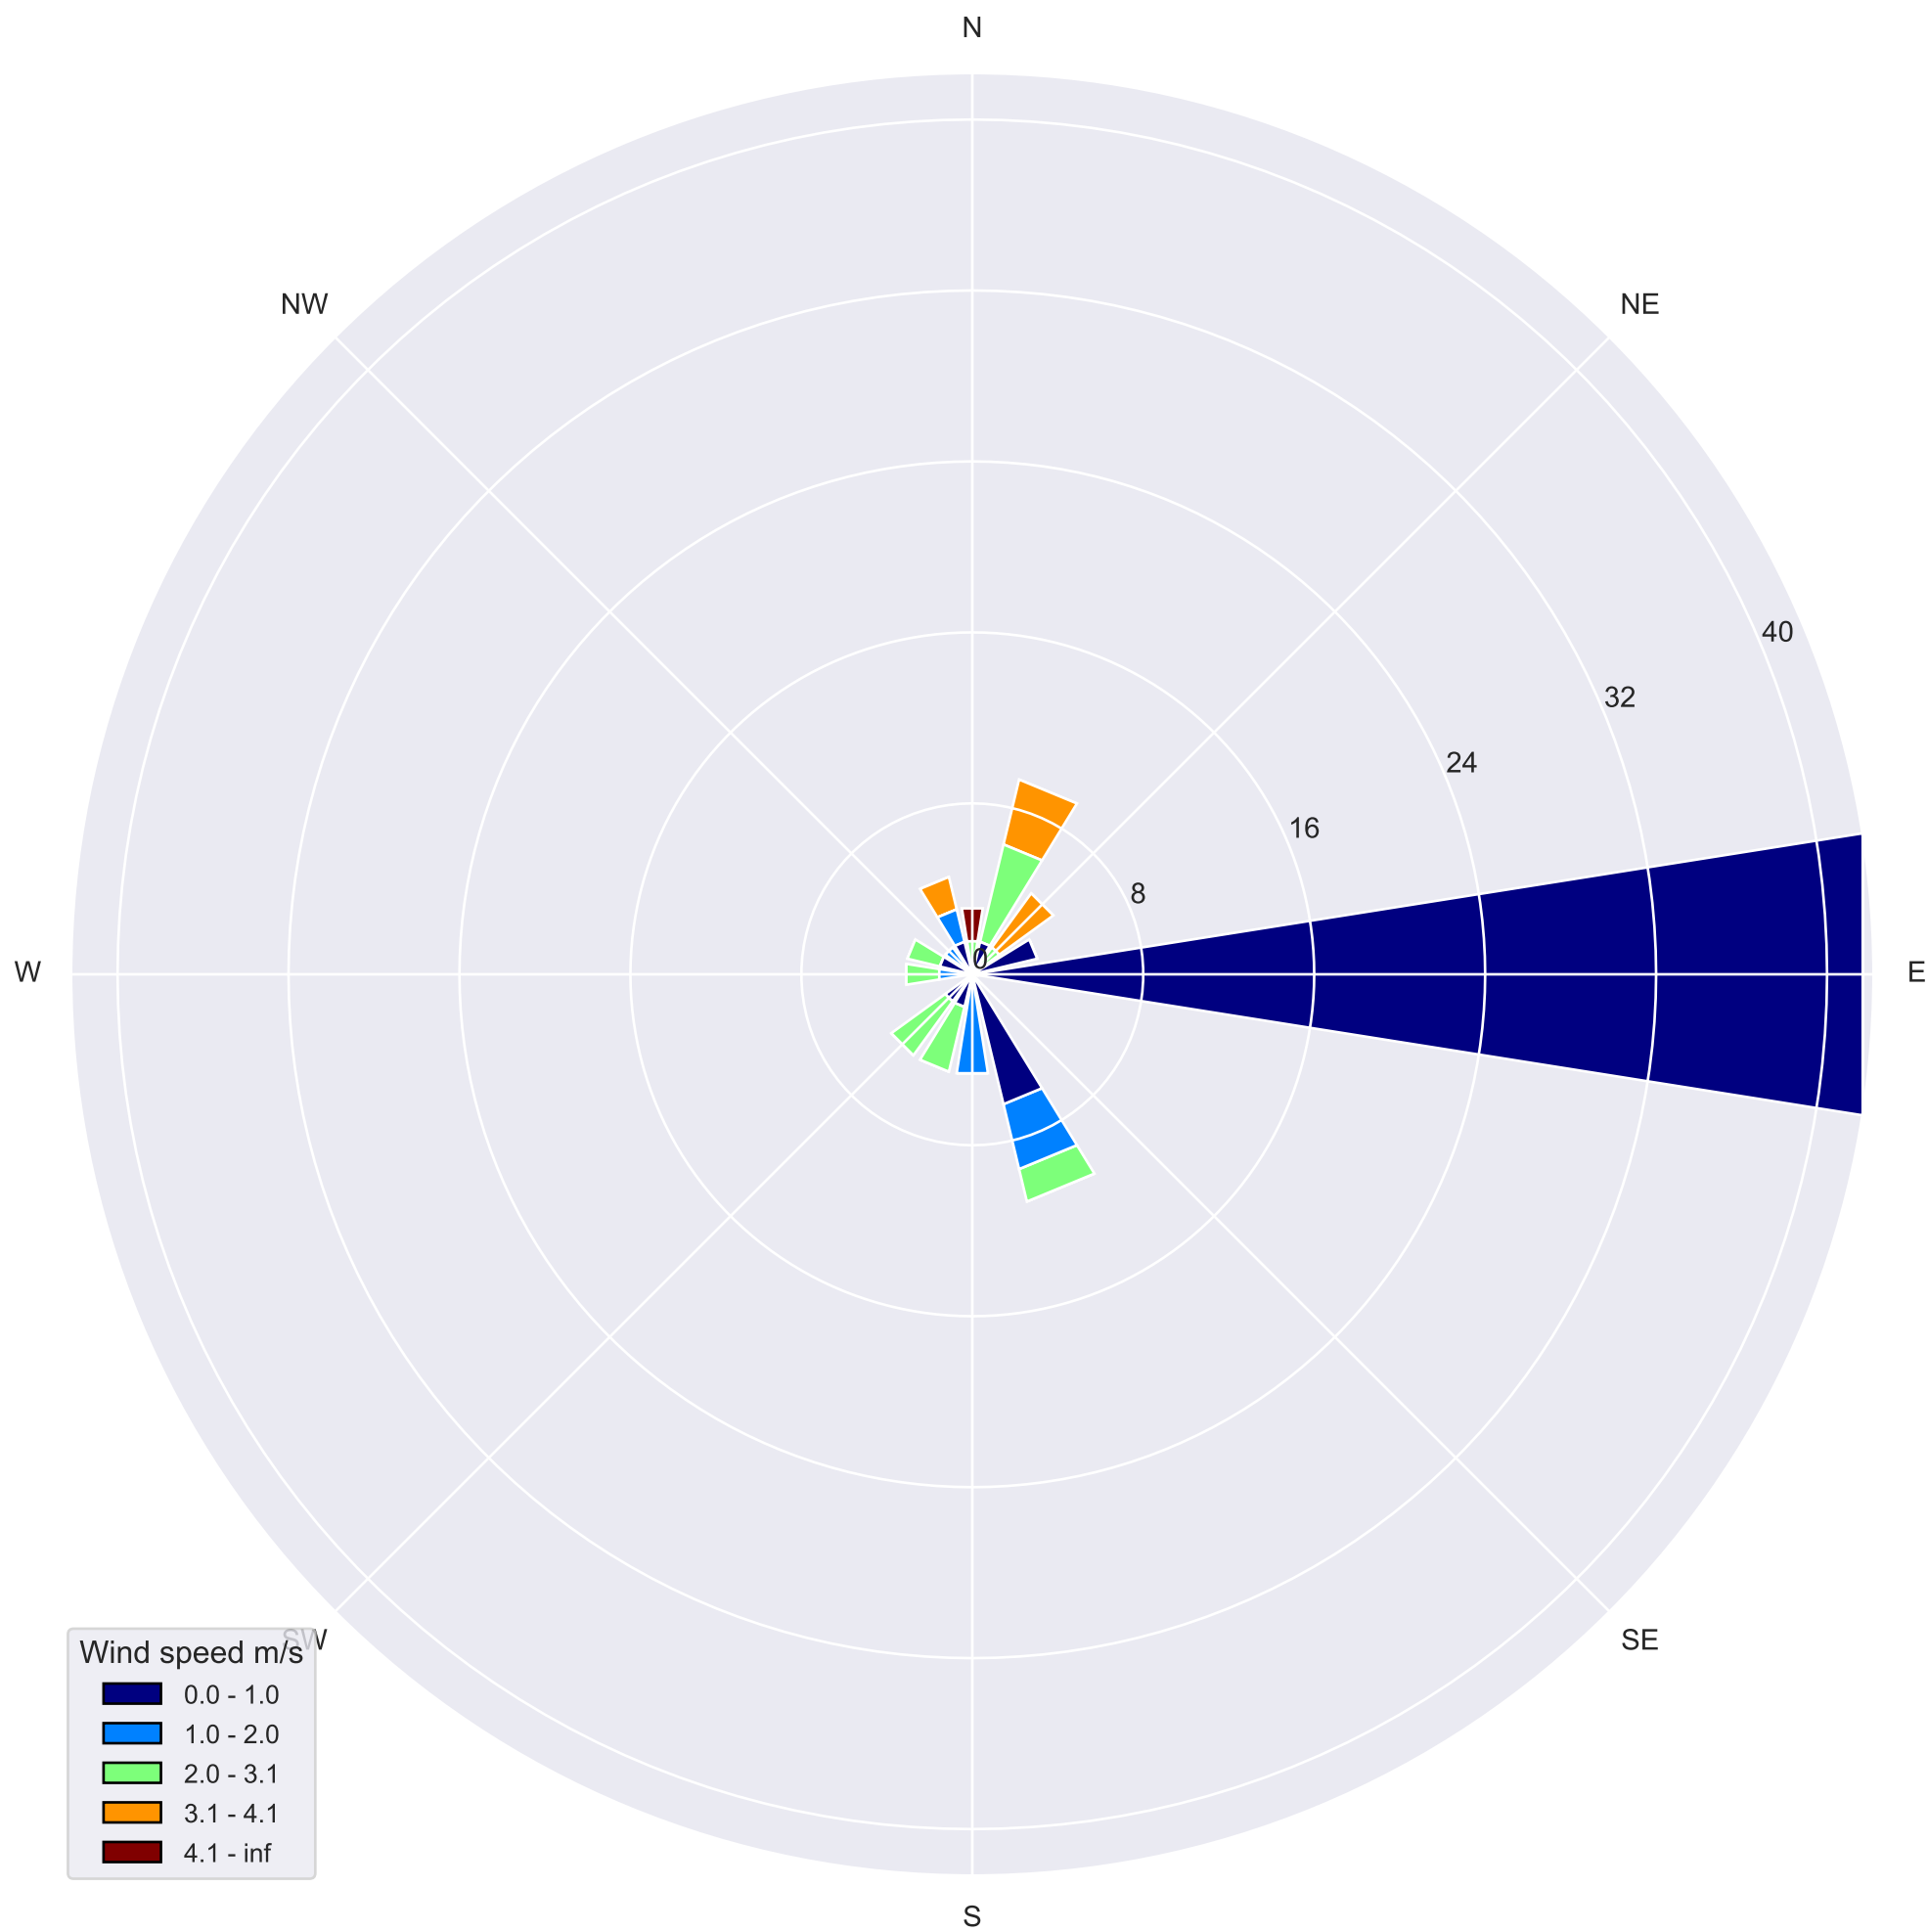

# Wind Direction and Speed MRR-6

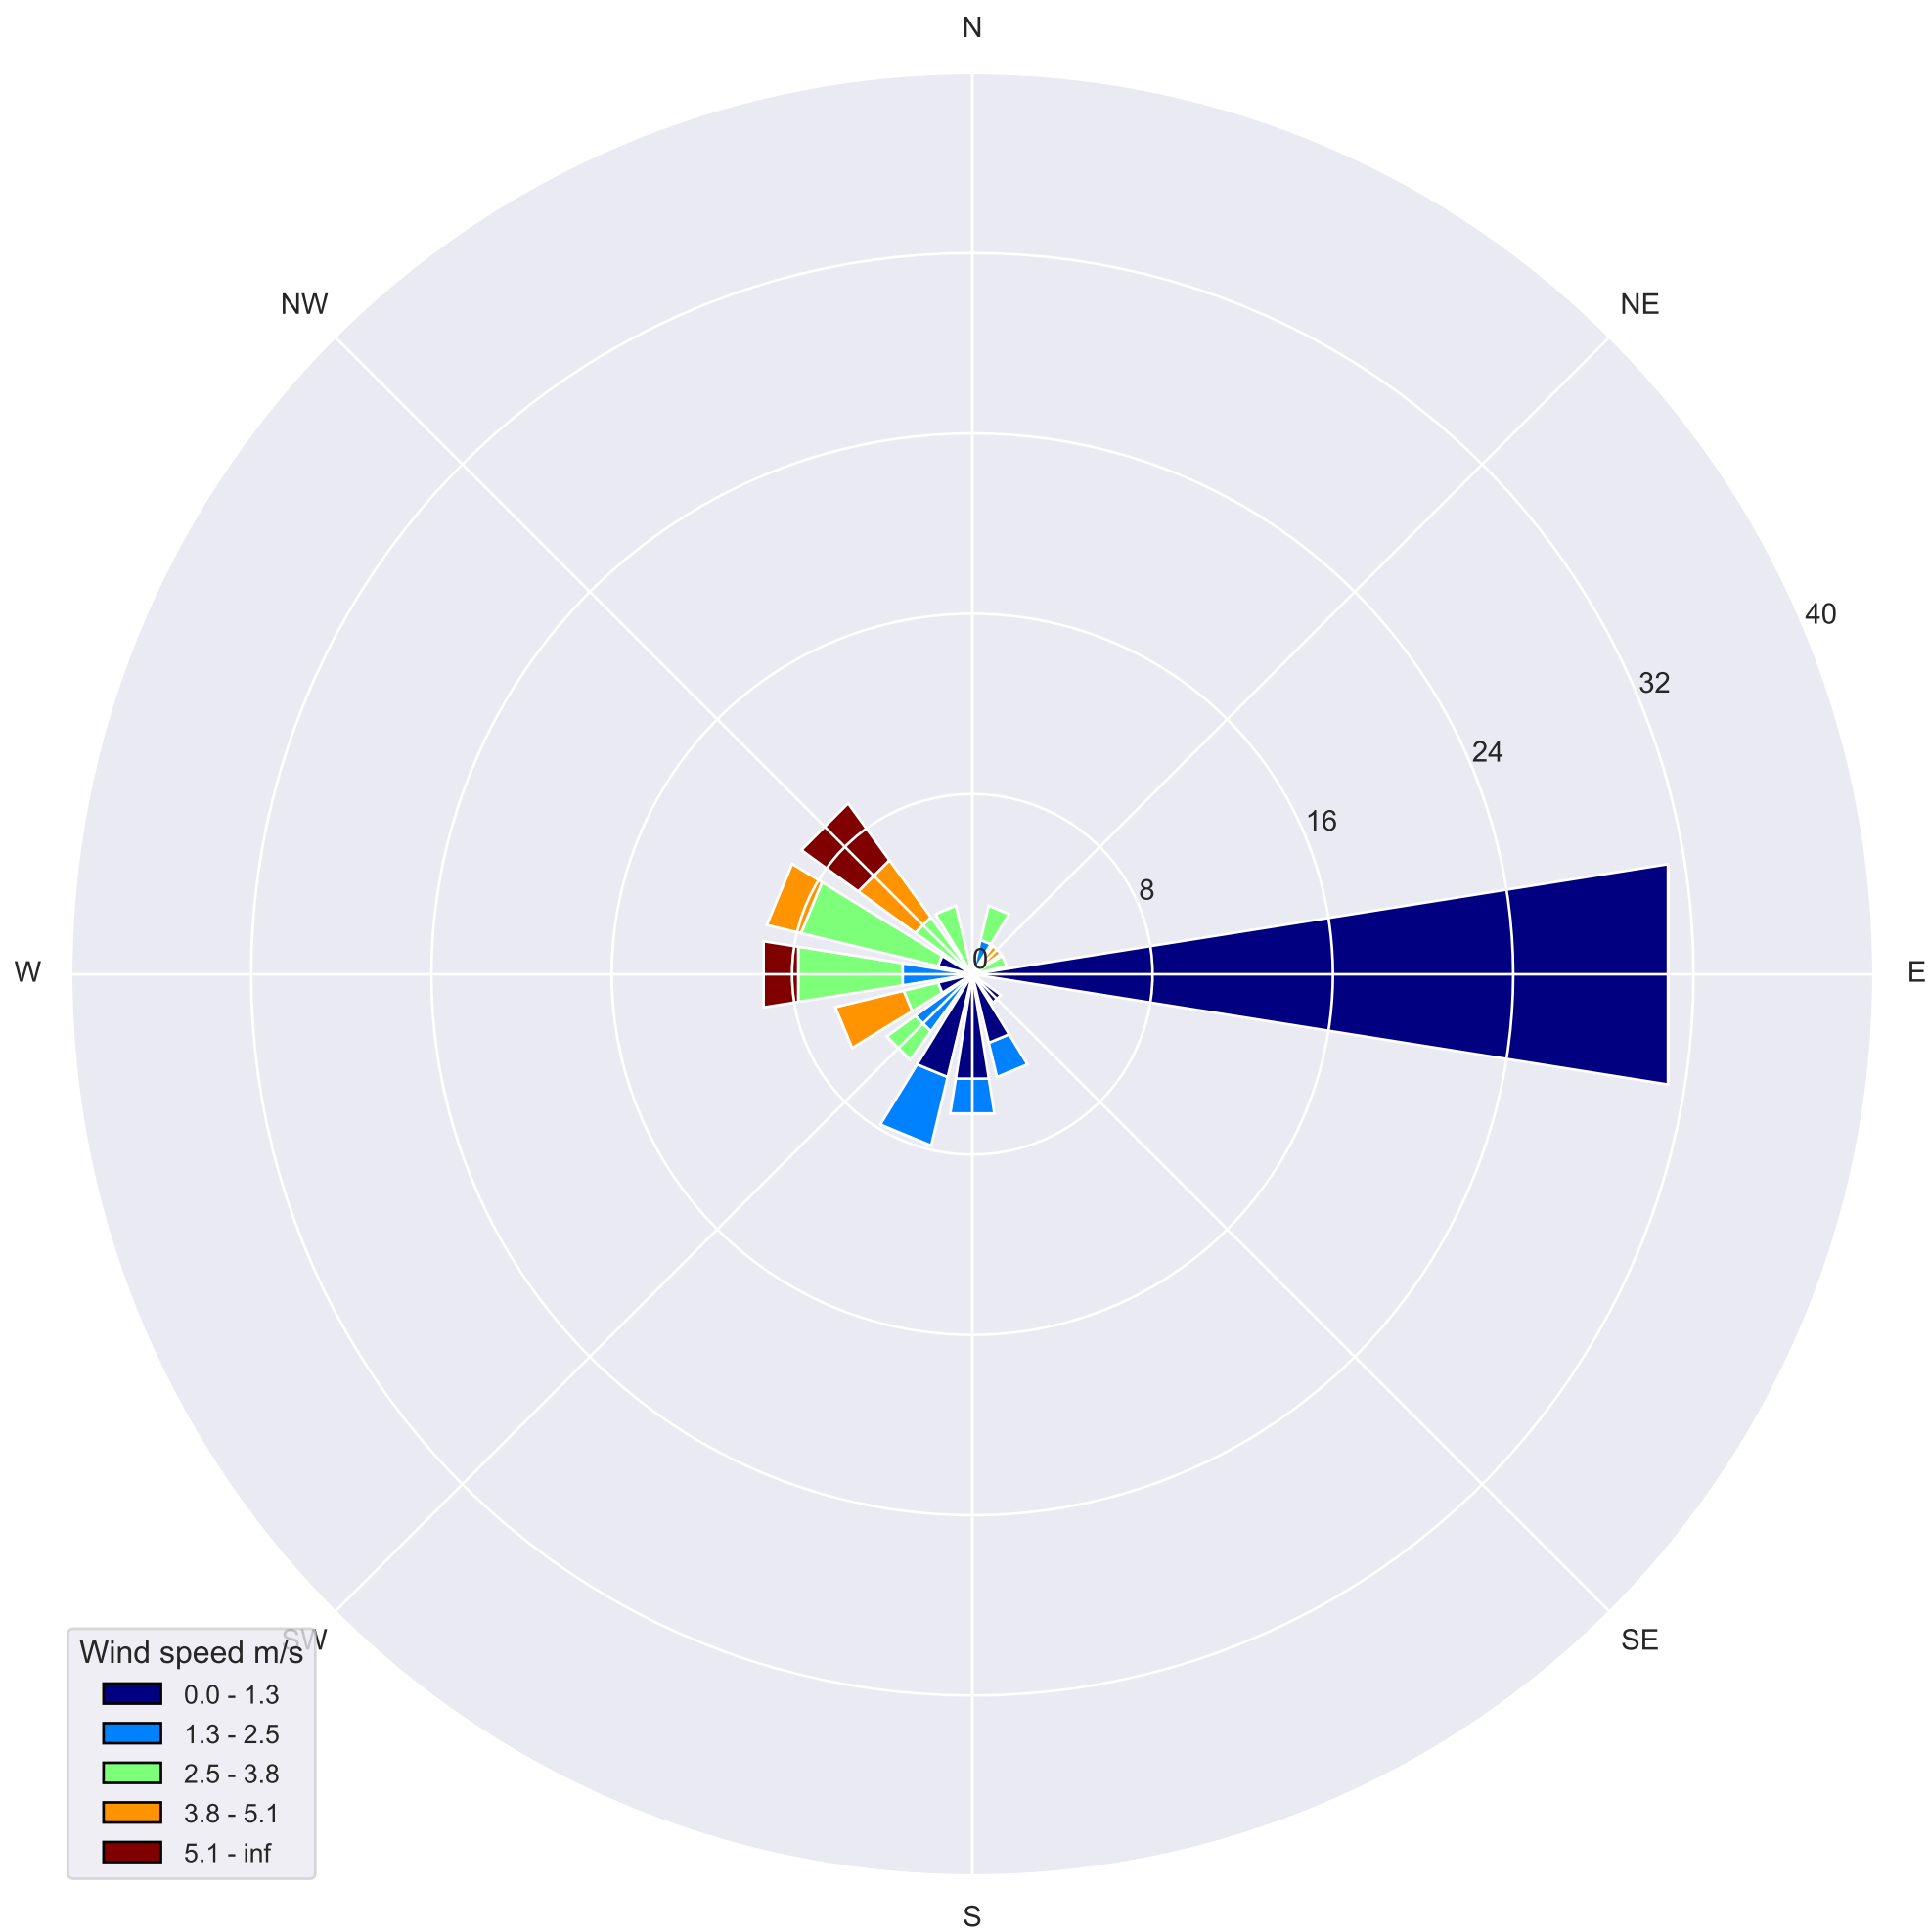

Supplement: pntd.0009357.s002.pdf [file pntd.0009357.s002.pdf]
